# Supplementary material for: αβ T-cell receptors from multiple sclerosis brain lesions show MAIT cell–related features
Source: PubMed Central journal article supplement — Neurol Neuroimmunol Neuroinflamm. 2015 May 7;2(4):e107. doi: 10.1212/NXI.0000000000000107 (PMC4426681; doi:10.1212/nxi.0000000000000107), 2015-05-07
Supplement: supp_2.4.e107_Figure_e2.pdf [file supp_2.4.e107_Figure_e2.pdf]

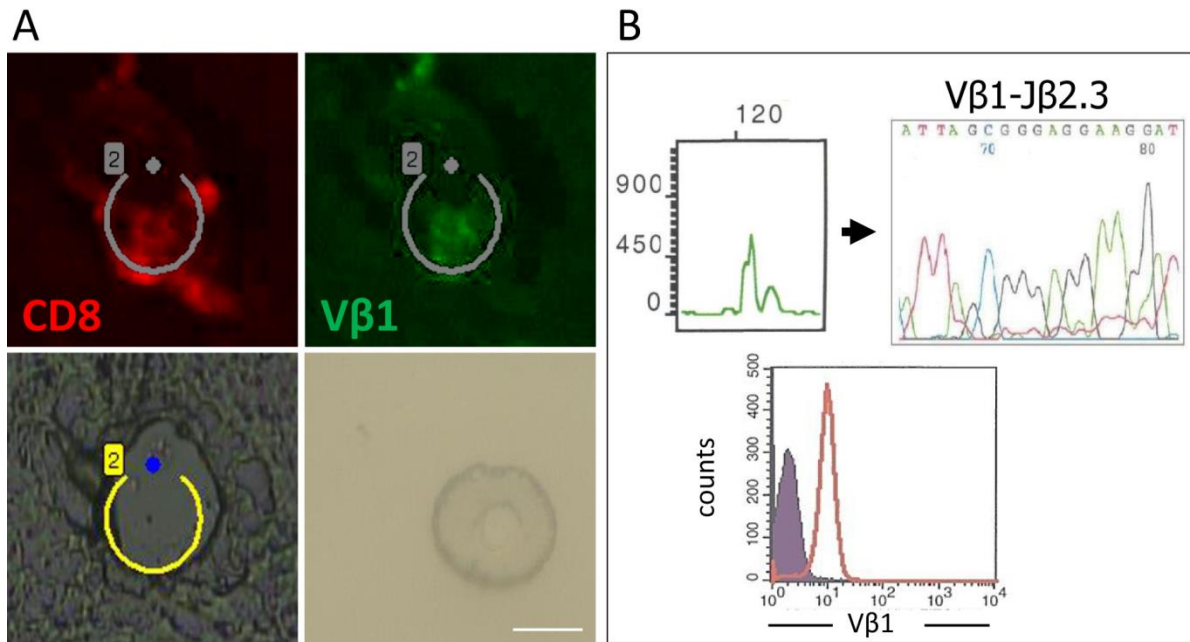

**Figure e-2: Isolation of single cells from frozen CNS specimen and peripheral blood.**

**A:** Laser-microdissection of single  $CD8^+V\beta1^+$  double-positive T cells from frozen sections of the brain lesion from patient A. The circle marks the area in the tissue section that is isolated.

*Upper left panel:* A cell is stained for CD8 (red).

*Upper right panel:* The same cell is stained for Vβ1 (green).

*Lower left panel:* The biopsy section after isolation of the  $CD8^+V\beta1^+$  double-positive T cell.

*Lower right panel:* The cell in the lid of a PCR tube. This cell is subject to TCR analysis by multiplex PCR.

**B:** Analysis and isolation of expanded T cell populations from peripheral blood of patient A taken 2003.

*Upper left panel:* CDR3 spectratyping reveals an expanded Vβ1-Jβ2.3 population. Primer pairs specific for Vβ1 and Jβ2.3 were used to amplify TCR β-chains from a blood sample from 2003 of patient A. The abscissa shows the length distribution of the PCR products, the ordinate the relative intensity. A strong single peak indicates an expanded T cell population, while a polyclonal population would yield more than 10 peaks with a Gaussian intensity distribution.

*Upper right panel:* The nucleotide sequence is revealed by direct sequencing of the PCR product.

*Lower panel:*  $V\beta1^+CD8^+$  positive cells are isolated by flow cytometry.
